# Supplementary material
Source: Royal Society of Chemistry journal article supplement (doi:10.1039/d6gc01234e)
Supplement: d6gc01234e1.pdf [file d6gc01234e1.pdf]

## Supporting Information

### **Boosting photocatalytic H<sub>2</sub>O<sub>2</sub> evolution through synergistic sulfur doping and crystalline engineering of carbon nitride**

Yumeng Qi, Meiyu Xu, Shuting Deng, Bo Wang\*, Shijie Wang\*, Wei Zhou\*

Shandong Provincial Key Laboratory of Molecular Engineering, School of Chemistry and Chemical Engineering, Qilu University of Technology (Shandong Academy of Sciences), Jinan, Shandong, 250353, P. R. China

*\*Corresponding authors. E-mail: wangb123@qlu.edu.cn (B. Wang), wsj0924@qlu.edu.cn (S. Wang), wzhou@qlu.edu.cn (W. Zhou)*

## Experimental Section

### Characterizations

The powder X-ray diffraction (XRD) patterns were tested using a Japanese Rigaku SmartLab SE X-ray diffractometer with a Cu K $\alpha$  X-ray source ( $\lambda = 1.5406 \text{ \AA}$ ). Transmission electron microscopy (TEM) was performed on a JEM-2100 instrument from Nippon Electronics Co., Ltd. Absorption spectra were performed on a UV-9000s UV-vis spectrometer from Shanghai Metash instruments Co., Ltd. The solid-state  $^{13}\text{C}$  MAS NMR spectra were recorded on a Bruker 600 MHz solid-state NMR spectrometer at room temperature. The Fourier transform infrared (FTIR) spectra was carried out with a Bruker Tensor 27 Fourier infrared spectrometer from Germany. The specific surface area was determined from the adsorption branch of the  $\text{N}_2$  adsorption-desorption isotherm using the Brunauer-Emmett-Teller (BET) equation. The corresponding pore size distribution was derived from the same adsorption branch data. The electron paramagnetic resonance (EPR) spectra were obtained on a Bruker EMX plus spectrometer at room temperature. The X-ray photoelectron spectroscopy (XPS) was tested using an ESCALAB Xi+ electron spectrometer from Thermo Fisher, which is equipped with a monochromatic Al K $\alpha$ . The steady-state photoluminescence (PL) spectra and time-resolved photoluminescence (TRPL) spectra of the as-prepared samples were obtained using an Edinburgh FLS1000 fluorescence spectrometer. The diffuse reflectance spectrum (DRS) was recorded on a UV-vis-NIR spectrophotometer (Agilent Cary 2000) in the wavelength range of 200-800 nm. The steady-state surface

photovoltage (SPV) measurement system includes computer, lock-in amplifier, monochromatic light and photovoltaic cell. The temperature-programmed oxygen desorption ( $O_2$ -TPD) measurements of the samples were performed using a Micromeritics Auto Chem II 2920 fully automated chemisorption analyzer.

### **Reactive species trapping experiments**

Silver nitrate ( $AgNO_3$ ), p-benzoquinone (pBQ), and  $\beta$ -carotene were employed as scavengers for electrons ( $e^-$ ), superoxide radicals ( $\cdot O_2^-$ ), and singlet oxygen ( $^1O_2$ ), respectively. Aqueous solutions containing the corresponding scavenger (1 mM) were freshly prepared. In a typical experiment, 5 mg of the photocatalyst was dispersed in 20 mL of the scavenger-containing solution, consisting of 2 mL benzyl alcohol (10 vol%) and 18 mL of the 1 mM scavenger solution. The suspension was magnetically stirred in the dark for 30 min under continuous  $O_2$  bubbling to establish adsorption-desorption equilibrium. The photocatalytic reactions were then carried out under the same conditions as described above. After 1 h of irradiation, 1.5 mL of the reaction solution was collected and filtered through a 0.22  $\mu m$  membrane to remove the catalyst. The resulting clear supernatant was subsequently analyzed for  $H_2O_2$  concentration. Control experiments without scavengers and with individual components were also conducted under identical conditions to ensure the reliability of the results.

### **$H_2O_2$ detection methods**

The concentration of  $H_2O_2$  was determined via an iodometric method. Briefly, 0.5 mL

of potassium hydrogen phthalate ( $\text{KC}_8\text{H}_5\text{O}_4$ ,  $0.1 \text{ mol L}^{-1}$ ) and 0.5 mL of potassium iodide (KI,  $0.4 \text{ mol L}^{-1}$ ) aqueous solutions were added to the collected supernatant. After standing for 30 min,  $\text{H}_2\text{O}_2$  in the acidic medium ( $\text{pH} \approx 3.5$ ) oxidized iodide ions ( $\text{I}^-$ ) to form triiodide ions ( $\text{I}_3^-$ ), which exhibit a strong characteristic absorption peak around 350 nm. The absorbance at 350 nm was measured using a UV-Vis spectrophotometer.

### **Photochemical measurements**

Photoelectrochemical performance testing was conducted on an electrochemical workstation (Shanghai Chenhua CHI760E). The test employed a three-electrode system: an Ag/AgCl electrode as the reference electrode, a platinum wire electrode as the counter electrode, and FTO conductive glass loaded with photocatalyst as the working electrode. Typically, 10.0 mg of catalyst is dispersed in a mixed solution consisting of 1.0 mL DMF and 20.0  $\mu\text{L}$  naphthol. Ultrasonic treatment ensures thorough mixing, yielding a uniform suspension. Subsequently, 10.0  $\mu\text{L}$  of the suspension is spotted onto a  $0.5 \text{ cm} \times 0.5 \text{ cm}$  area of the FTO glass surface and dried in a  $60 \text{ }^\circ\text{C}$  oven to prepare the working electrode. A 300 W Xe lamp (PLS-FX300D, Beijing Perfect light Technology Co., Ltd.) was used as the light source with a 0.5 M  $\text{Na}_2\text{SO}_4$  solution or a 10 mM mixture of  $\text{K}_3\text{Fe}(\text{CN})_6$  and  $\text{K}_4\text{FeC}_6\text{N}_6 \cdot 3\text{H}_2\text{O}$  served as the electrolyte.

### **Rotating disk electrode (RDE) measurements**

10.0 mg of the catalyst was dispersed in a mixed solution composed of 1.0 mL DMF

and 20.0  $\mu\text{L}$  Nafion. The mixture was then homogenized by ultrasonication to obtain a homogeneous catalyst suspension. Subsequently, 10.0  $\mu\text{L}$  of the suspension was drop-cast onto the surface of a glassy carbon rotating disk electrode (RDE, 0.196  $\text{cm}^2$ ) and dried naturally in ambient air to fabricate the working electrode. An Ag/AgCl electrode and a carbon rod were employed as the reference electrode and the counter electrode, respectively.

Linear sweep voltammetry was performed in an  $\text{O}_2$ -saturated phosphate buffer solution (pH = 7) at a scan rate of 5  $\text{mV s}^{-1}$ . The average electron transfer number ( $n$ ) for the oxygen reduction reaction was calculated from the slopes of the corresponding Koutecky-Levich plots using the following equation:

$$J^{-1} = J_k^{-1} + B^{-1}\omega^{-\frac{1}{2}}$$

$$B = 0.2nFC_0D_0^{\frac{2}{3}}\nu^{-\frac{1}{6}}$$

where  $J$ ,  $J_k$ , and  $\omega$  are the measured current density, kinetic limiting current density and rotating rate (rpm), respectively. In addition,  $B$  is determined from the slope of the Koutecky-Levich plots, and  $F$  is the Faraday constant ( $F = 96485 \text{ C mol}^{-1}$ ). Moreover,  $C_0$  is the concentration of  $\text{O}_2$  in the solution ( $C_0 = 1.26 \times 10^{-6} \text{ mol cm}^{-3}$ ),  $D_0$  is the diffusion coefficient of  $\text{O}_2$  ( $D_0 = 2.7 \times 10^{-5} \text{ cm}^2 \text{ s}^{-1}$ ), and  $\nu$  is the kinematics viscosity of the electrolyte ( $\nu = 0.01 \text{ cm}^2 \text{ s}^{-1}$ ).

### **In-situ DRIFTS testing experiments**

In-situ Fourier transform infrared spectra (in-situ FTIRS) were recorded using a Bruker Tensor 27 spectrometer. The CSCN powder was loaded into an in-situ sample cell and purged with N<sub>2</sub> flow for 30 min to remove residual gases before collecting the background spectrum. Subsequently, the atmosphere was switched to a continuous flow of a mixture of O<sub>2</sub> and water vapor for 30 min, during which IR spectra were collected at 10-min intervals. A 300 W xenon lamp (PLS-FX300D, Beijing Perfect light Technology Co., Ltd.) was employed as the light source throughout the experiments.

### **The apparent quantum yield (AQY) measurement**

The apparent quantum yield (AQY) for H<sub>2</sub>O<sub>2</sub> production was determined under monochromatic light irradiation using a bandpass filter (365 nm, 385 nm, 420 nm, 450nm, 485nm and 520 nm). The effective irradiation area was approximately 7.065 cm<sup>2</sup>.

The amount of H<sub>2</sub>O<sub>2</sub> generated during 1 h of photocatalytic reaction was quantified, and the AQY was calculated according to the following equation:

$$AQY(\%) = \frac{2 * \text{number of } H_2O_2 \text{ molecules formed}}{\text{number of incident photons}} * 100\%$$

$$= \frac{2 * M(H_2O_2) * N_A * h * c}{S * P * t * \lambda} * 100\%$$

Where  $M(H_2O_2)$  is the amount of produced H<sub>2</sub>O<sub>2</sub> (mol),  $N_A$  is Avogadro's constant ( $6.02 \times 10^{23} \text{ mol}^{-1}$ ),  $h$  is Planck's constant ( $6.626 \times 10^{-34} \text{ J}\cdot\text{s}$ ),  $c$  is the speed of light ( $3.0 \times 10^8 \text{ m}\cdot\text{s}^{-1}$ ),  $S$  is the irradiation area (7.065 cm<sup>2</sup>),  $P$  is the incident light intensity at 420

nm ( $0.0485 \text{ W}\cdot\text{cm}^{-2}$ ),  $t$  is the irradiation time (3600 s), and  $\lambda$  is the wavelength of the incident light ( $420 \times 10^{-9} \text{ m}$ ).

### **DFT calculations**

All calculations were carried out for the material in the framework of Density Functional Theory (DFT) using the Vienna Ab initio Simulation Package (VASP 6.3.0).<sup>1</sup>

<sup>2</sup> The generalised gradient approximation (GGA) of the Perdew-Burke-Ernzerhof (PBE) function was used to describe the exchange-correlation energy.<sup>3</sup> The projected augmented wave (PAW) method and pseudopotentials were used to describe the interactions between valence electrons and ions.<sup>4</sup>

To ensure the efficiency of the computational results and parallel computing. A  $3*3*1$  k-point grid under Monkhorst-Pack is used in the optimisation process and 450 eV truncation energy is set. The lattice parameters and ionic positions of all crystals were fully relaxed, and the convergence criteria for the total energy of all relaxed atoms and the final force were  $10^{-6} \text{ eV}$  and  $0.03 \text{ eV}/\text{\AA}$ , respectively.

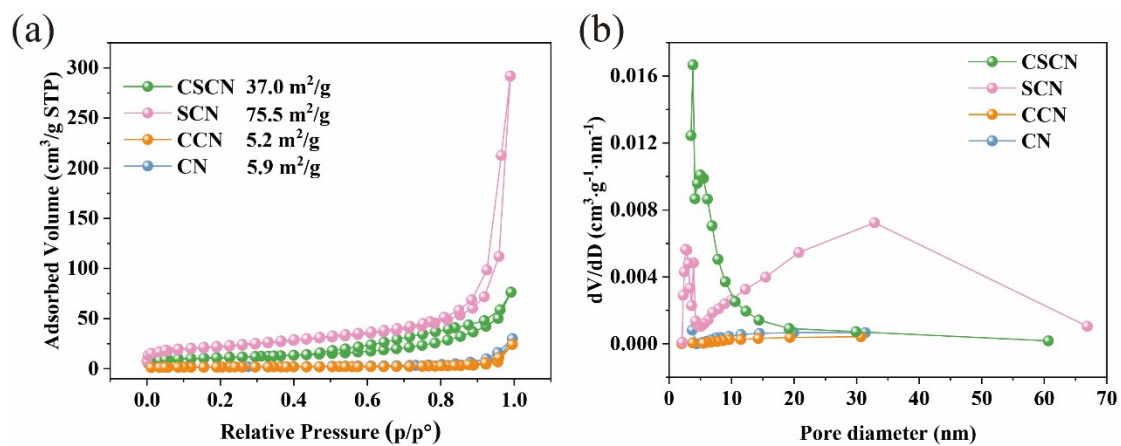

**Fig. S1.** (a) N<sub>2</sub> adsorption-desorption isotherms and (b) the corresponding pore size distributions for CN, SCN, CCN, and CSCN.

**Table S1. The elemental composition (C, N, H, and S content) quantified using elemental analysis (EA).**

|             | <b>N (%)</b> | <b>C (%)</b> | <b>H (%)</b> | <b>S (%)</b> |
|-------------|--------------|--------------|--------------|--------------|
| <b>CN</b>   | 62.06        | 35.16        | 1.965        | -            |
| <b>CCN</b>  | 53.60        | 31.19        | 1.639        | -            |
| <b>SCN</b>  | 61.52        | 35.25        | 1.768        | 0.154        |
| <b>CSCN</b> | 44.34        | 27.08        | 2.244        | 0.105        |

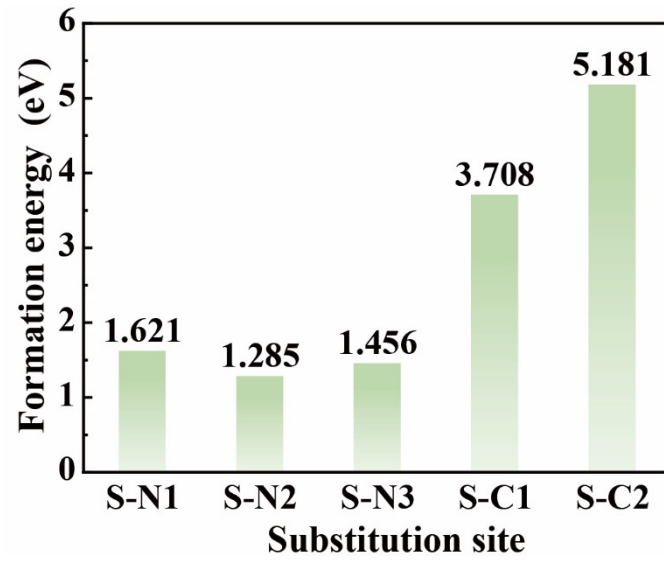

**Fig. S2.** Formation energies for S substitution at different C/N atomic sites.

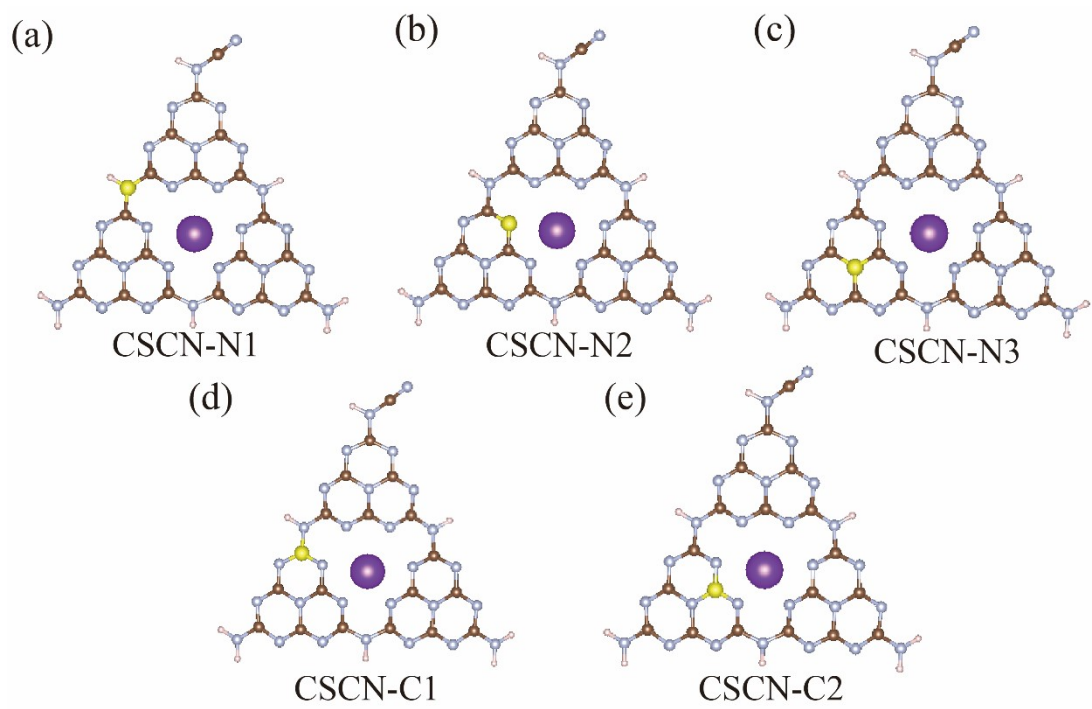

**Fig. S3.** Structural models for S substitution at different C/N atomic sites.

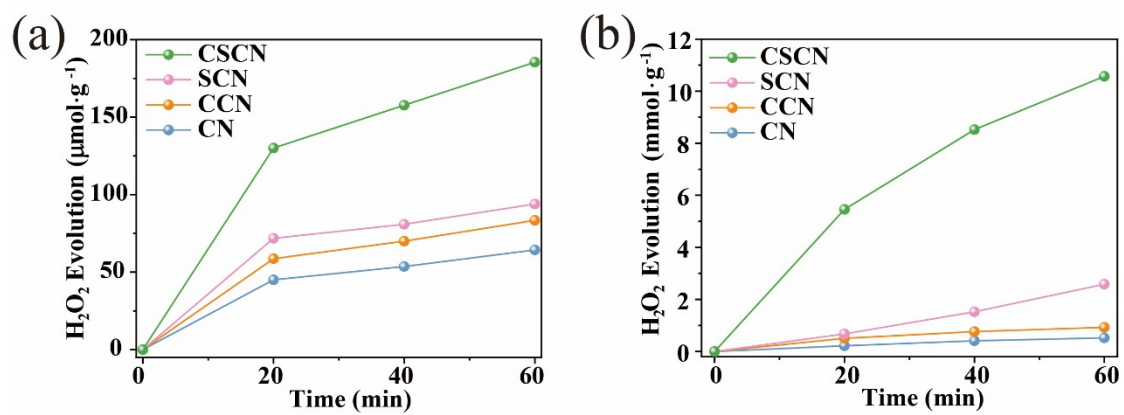

**Fig. S4.** Photocatalytic activity of CN, CCN, SCN and CSCN for H<sub>2</sub>O<sub>2</sub> generation in (a) pure water and (b) 10% (v/v) benzyl alcohol.

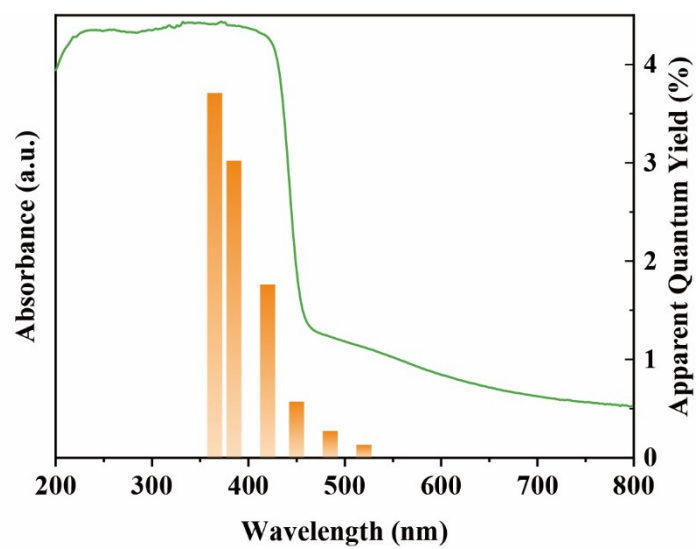

**Fig. S5.** Apparent quantum yield (AQY) of CSCN as a function of irradiation wavelength.

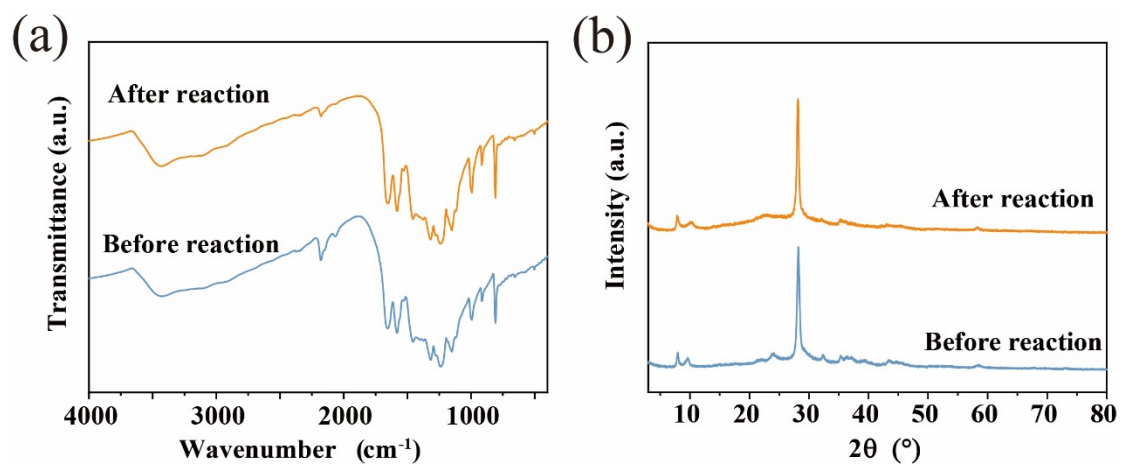

**Fig. S6.** (a) FTIR spectra and (b) XRD patterns of CSCN before and after the photocatalytic  $\text{H}_2\text{O}_2$  production reaction.

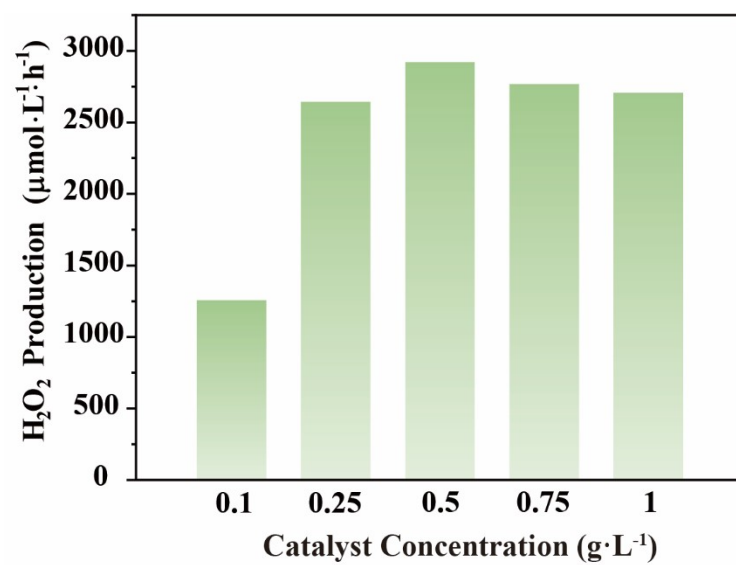

**Fig. S7.** Effect of catalyst concentrations on photocatalytic H<sub>2</sub>O<sub>2</sub> production (0.1-1 g·L<sup>-1</sup>).

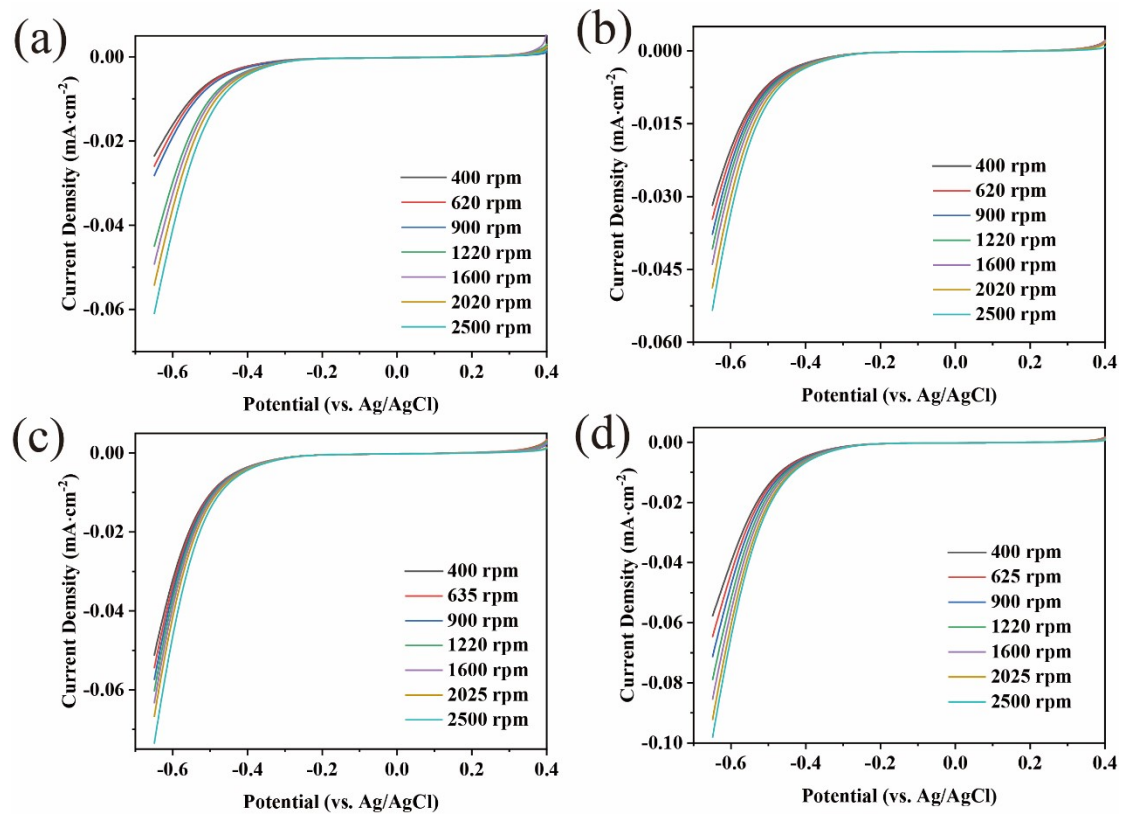

**Fig. S8.** LSV curves of (a) CN, (b) CCN, (c) SCN, and (d) CSCN recorded at various electrode rotation speeds.

**Table S2. Exponential decay fitting parameters of fluorescence lifetime for experimental samples.**

| Sample | $\tau_1/\text{ns}$ | $A_1$   | $\tau_2/\text{ns}$ | $A_2$   | $\tau_{\text{ave}}/\text{ns}$ |
|--------|--------------------|---------|--------------------|---------|-------------------------------|
| CN     | 1.12675            | 0.69017 | 4.88278            | 0.38321 | 3.78                          |
| CCN    | 1.36687            | 0.9448  | 6.40376            | 0.14393 | 3.64                          |
| SCN    | 1.21653            | 0.88777 | 5.85387            | 0.20996 | 3.68                          |
| CSCN   | 0.67634            | 1.17037 | 5.62834            | 0.03436 | 1.65                          |

The time-resolved PL spectra were fitted with a biexponential decay function, and the average PL lifetime ( $\tau_{\text{ave}}$ ) was calculated using the equation below:

$$\tau_{\text{ave}} = \frac{A_1 \times \tau_1^2 + A_2 \times \tau_2^2}{A_1 \times \tau_1 + A_2 \times \tau_2}$$

$\tau_i$  is the estimated lifetime value and  $A_i$  is the corresponding amplitude.

**Table S3. Comparison of H<sub>2</sub>O<sub>2</sub> production activity in O<sub>2</sub>-saturated pure water with reported systems.**

| Photocatalyst                              | Catalyst Concentration (g L <sup>-1</sup> ) | Light source                                          | H <sub>2</sub> O <sub>2</sub> production (mmol g <sup>-1</sup> h <sup>-1</sup> ) | Refs      |
|--------------------------------------------|---------------------------------------------|-------------------------------------------------------|----------------------------------------------------------------------------------|-----------|
| g-C <sub>3</sub> N <sub>4</sub> -Au        | 0.5                                         | 300 W Xe lamp (AM 1.5)                                | 16.14                                                                            | 5         |
| g-C <sub>3</sub> N <sub>4</sub> /PDI BNRGO | 1.67                                        | 300 W Xe lamp (λ ≥ 420 nm)                            | 29.1                                                                             | 6         |
| C <sub>3</sub> N <sub>4</sub> -nv          | 1.0                                         | 300 W Xe lamp (λ ≥ 420 nm)                            | 75.66                                                                            | 7         |
| CNTTT-CTF                                  | 0.5                                         | LED lamp (λ ≥ 400 nm)                                 | 96                                                                               | 8         |
| OCN-500                                    | 1.0                                         | 300 W Xe lamp (λ ≥ 420 nm)                            | 106                                                                              | 9         |
| ZnPPc-NBCN                                 | 0.5                                         | 100 mW/cm <sup>2</sup> Xe lamp (λ ≥ 400 nm)           | 114                                                                              | 10        |
| HJ-C <sub>3</sub> N <sub>4</sub>           | 1.0                                         | 300 W Xe lamp (λ ≥ 400 nm)                            | 115                                                                              | 11        |
| CO/AQ/C <sub>3</sub> N <sub>4</sub>        | 0.5                                         | 300 W Xe lamp (AM 1.5 G)                              | 124                                                                              | 12        |
| Nv-C≡N-CN                                  | 1.0                                         | 300 W Xe lamp (λ ≥ 420 nm)                            | 137                                                                              | 13        |
| CN-NH <sub>4</sub> -NaK                    | 0.5                                         | 300 W Xe lamp (λ ≥ 420 nm)                            | 139                                                                              | 14        |
| CSCN                                       | 0.25                                        | 450 mW/cm <sup>2</sup> LED lamp (780 nm ≥ λ ≥ 380 nm) | 185.41                                                                           | This work |

**Table S4. Comparison of photocatalytic H<sub>2</sub>O<sub>2</sub> production in sacrificial agent-containing, O<sub>2</sub>-saturated aqueous systems with recent reports.**

| Photocatalyst                                     | Sacrificial agent | Catalyst Concentration (g L <sup>-1</sup> ) | Light source                                                | H <sub>2</sub> O <sub>2</sub> production (mmol g <sup>-1</sup> h <sup>-1</sup> ) | Refs      |
|---------------------------------------------------|-------------------|---------------------------------------------|-------------------------------------------------------------|----------------------------------------------------------------------------------|-----------|
| UCN4                                              | 10 vol.% EtOH     | 1.0                                         | 300 W Xe lamp (λ ≥ 420 nm)                                  | 99.11                                                                            | 15        |
| CN/HMoP                                           | 5 vol.% EtOH      | 0.5                                         | 300 W Xe lamp (λ ≥ 420 nm)                                  | 226.2                                                                            | 16        |
| BI-CN3                                            | 10 vol.% EtOH     | 0.5                                         | 5 W LED lamp (λ ≥ 420 nm)                                   | 706                                                                              | 17        |
| DDCN                                              | 10 vol.% MtOH     | 0.2                                         | 300 W Xe lamp (λ ≥ 420 nm)                                  | 1031                                                                             | 18        |
| C-P-CN                                            | 10 vol.% EtOH     | 1.0                                         | 300 W Xe lamp (λ ≥ 400 nm)                                  | 3320                                                                             | 19        |
| Cv@g-C <sub>3</sub> N <sub>4</sub>                | 10 vol.% EtOH     | 1.0                                         | 300 W Xe lamp (λ ≥ 420 nm)                                  | 7010                                                                             | 20        |
| Sb <sub>1</sub> /Cv-C <sub>3</sub> N <sub>4</sub> | 10 vol.% IPA      | 1.0                                         | 300 W Xe lamp (λ ≥ 400 nm)                                  | 5369                                                                             | 21        |
| Ag@T-C <sub>3</sub> N <sub>4</sub>                | 50 vol.% BA       | 1.0                                         | 300 W Xe lamp (λ ≥ 420 nm)                                  | 4729.82                                                                          | 22        |
| TP-PCN                                            | 10 vol.% IPA      | 0.5                                         | 300 W Xe lamp (λ ≥ 420 nm)                                  | 6530.8                                                                           | 23        |
| CCN-550                                           | 1 vol.% BA        | 1.33                                        | 300 W Xe lamp (λ ≥ 420 nm)                                  | 4379.18                                                                          | 24        |
| CSCN                                              | 10 vol.% BA       | 0.25                                        | 450 mW/cm <sup>2</sup><br>LED lamp<br>(780 nm ≥ λ ≥ 380 nm) | 11840                                                                            | This work |

**Table S5. Comparative assessment of representative H<sub>2</sub>O<sub>2</sub> production routes.**

| <b>Method</b>                                           | <b>Reaction Pathway</b>                                                                        | <b>Advantages</b>                                                                                 | <b>Limitations</b>                                                                                            | <b>Applicable Scale</b>             | <b>Refs</b> |
|---------------------------------------------------------|------------------------------------------------------------------------------------------------|---------------------------------------------------------------------------------------------------|---------------------------------------------------------------------------------------------------------------|-------------------------------------|-------------|
| <b>Anthraquinone Process</b>                            | Hydrogenation -oxidation cycle using anthraquinone carriers                                    | High productivity; well-established industrial infrastructure                                     | Relies on organic solvents and Pd-based catalysts; waste generation and environmental concerns                | Large-scale industrial              | 25          |
| <b>Direct Synthesis (H<sub>2</sub> + O<sub>2</sub>)</b> | Catalytic combination of Hydrogen and Oxygen to form H <sub>2</sub> O <sub>2</sub>             | High atom economy; relatively straightforward reaction pathway                                    | Safety risks (explosive gas mixtures); high equipment requirement.; requires noble metal catalysts            | Medium-small scale production       | 26          |
| <b>Electrochemical Method</b>                           | Two-electron oxygen reduction reaction (2e <sup>-</sup> ORR) at the cathode                    | Environmentally friendly, suitable for small-scale production.                                    | High electricity consumption; low efficiency                                                                  | Small-scale production              | 27          |
| <b>Photocatalytic Method</b>                            | Light-driven reduction of O <sub>2</sub> in aqueous systems using semiconductor photocatalysts | Utilizes solar energy; mild conditions; no hazardous reagents; compatible with pure water systems | Current efficiency and stability need improvement; relatively low reaction rate compared to industrial routes | Suitable for sustainable production | 28          |

## References

1. G. Kresse, J. Furthmüller, *Phys. Rev. B.*, 1996, **54**, 11169-11186.
2. G. Kresse, D. Joubert, *Phys. Rev. B.*, 1999, **59** 1758-1775.
3. J.P. Perdew, K. Burke, M. Ernzerhof, *Phys. Rev. Lett.*, 1996, **77**, 3865-3868.
4. P.E. Blöchl, Projector augmented-wave method, *Phys. Rev. B.*, 1994, **50**, 953-17979.
5. G. Wang, T. Huang, Y. Tan, S. Liu, R. Wu, Z. Fang, B. Yang, S. Wei, *ACS Appl. Nano Mater.*, 2025, **8**, 6125-6132.
6. Y. Kofuji, Y. Isobe, Y. Shiraishi, H. Sakamoto, S. Tanaka, S. Ichikawa, T. Hirai, *J. Am. Chem. Soc.*, 2016, **138**, 10019-10025.
7. Y. Lu, Y. Guo, S. Zhang, L. Li, R. Jiang, D. Zhang, J.C. Yu, J. Wang, *ACS Nano*, 2024, **18**, 20435-20448.
8. P. Shang, X. Yang, X. Zou, Y. Li, S. Pang, *Commun. Mater.*, 2025, **6**, 102.
9. Z. Wei, M. Liu, Z. Zhang, W. Yao, H. Tan, Y. Zhu, *Energy Environ. Sci.*, 2018, **11**, 2581-2589.
10. Y.-X. Ye, J. Pan, F. Xie, L. Gong, S. Huang, Z. Ke, F. Zhu, J. Xu, G. Ouyang, *Proc. Natl. Acad. Sci.*, 2021, **118**, e2103964118.
11. P. Ma, X. Zhang, C. Wang, Z. Wang, K. Wang, Y. Feng, J. Wang, Y. Zhai, J. Deng, L. Wang, K. Zheng, *Appl. Catal. B-Environ.*, 2022, **300**, 120736.
12. C. Chu, Q. Zhu, Z. Pan, S. Gupta, D. Huang, Y. Du, S. Weon, Y. Wu, C. Muhich, E. Stavitski, K. Domen, J.-H. Kim, *Proc. Natl. Acad. Sci.*, 2020, **117**, 6376-6382.
13. X. Zhang, P. Ma, C. Wang, L. Gan, X. Chen, P. Zhang, Y. Wang, H. Li, L. Wang, X. Zhou, K. Zheng, *Energy Environ. Sci.*, 2022, **15**, 830-842.
14. F. He, Y. Lu, Y. Wu, S. Wang, Y. Zhang, P. Dong, Y. Wang, C. Zhao, S. Wang, J. Zhang, S. Wang, *Adv. Mater.*, 2024, **36** 2307490.
15. C. Zhou, Y. Song, Z. Wang, J. Liu, P. Sun, Z. Mo, J. Yi, L. Zhai, *J. Environ. Chem. Eng.*, 2023, **11**, 110138.
16. X. Liu, Y. Li, K. Lin, Y. Jiang, *J. Colloid Interface Sci.*, 2024, **654**, 1228-1239.
17. A. Meng, X. Ma, D. Wen, W. Zhong, S. Zhou, Y. Su, *Chin. J. Catal.*, 2024, **60**, 231-241.
18. G. Ba, H. Hu, F. Bi, J. Yu, E. Liu, J. Ye, D. Wang, *Appl. Catal., B-Environ.*, 2025, **361**, 124645.
19. W. Wei, L. Zou, J. Li, F. Hou, Z. Sheng, Y. Li, Z. Guo, A. Wei, *J. Colloid Interface Sci.*, 2023, **636**, 537-548.
20. L. Chen, C. Chen, Z. Yang, S. Li, C. Chu, B. Chen, *Adv. Funct. Mater.*, 2021, **31**, 2105731.
21. Q. He, J. Ding, H.-J. Tsai, Y. Liu, M. Wei, Q. Zhang, Z. Wei, Z. Chen, J. Huang, S.-F. Hung, H. Yang, Y. Zhai, *J. Colloid Interface Sci.*, 2023, **651**, 18-26.
22. X. Zhou, K. Cao, S. Huang, H. Wu, Z. Cao, H. Liu, P. Chen, D. Su, G. Wang, T. Wang, C. Wang, H. Pang, *Angew. Chem. Int. Ed.*, 2025, **137**, e202505532.
23. H. Che, X. Gao, J. Chen, J. Hou, Y. Ao, *Angew. Chem. Int. Ed.*, 2021, **60**, 25546-25550.
24. J.J. Foo, S.-F. Ng, S.H. Kok, X. Zeng, L.-L. Tan, W.-J. Ong, *Chem. Eng. J.*, 2025, **505**, 158992.
25. H. B. Li, B. Zheng, Z. Y. Pan, B. N. Zong and M. H. Qiao, *Front. Chem. Sci. Eng.*, 2018, **12**, 124-131.
26. Y. Zhang, X. L. Wang, Z. Y. Wang, L. Y. Liu, X. H. He and H. B. Ji, *Dalton Trans.*, 2024, **53**, 18069-18082.
27. Y. N. Wang, J. T. Wu, Q. Zhang, Y. J. Tan, J. Gao, X. D. Zhu, Y. C. Zhang and S. J. Guo, *Matter*, 2025, **8**, 11.
28. Y. Y. Tang, W. M. Wang, J. Q. Ran, C. Peng, Z. X. Xu and W. H. Chu, *Energy Environ. Sci.*, 2024, **17**, 6482-6498.
